# Supplementary material
Source: PubMed Central journal article supplement (PMC6894537)
Supplement: rspa20190516_review_history.pdf [file rspa20190516_review_history.pdf]

## The what, why and how of curly hair: a review

Elsabe Cloete, Nonhlanhla P. Khumalo and Malebogo N. Ngoepe

### Article citation details

*Proc. R. Soc. A* **475**: 20190516.

<http://dx.doi.org/10.1098/rspa.2019.0516>

### Review timeline

Original submission: 10 August 2019  
Revised submission: 24 September 2019  
Final acceptance: 16 October 2019

Note: Reports are unedited and appear as submitted by the referee. The review history appears in chronological order.

## Review History

### RSPA-2019-0516.R0 (Original submission)

#### Review form: Referee 1 (Gillian E. Westgate)

Can the paper be shortened without overall detriment to the main message?

Yes

Do you think some of the material would be more appropriate as an electronic appendix?

No

Do you have any ethical concerns with this paper?

No

### Recommendation?

Accept with minor revision (please list in comments)

### Comments to the Author(s)

This is a very readable review of what is a complex topic that relies on many disciplines for its study. I really enjoyed reading the paper and offer the following suggestions to help make some small improvements.

line 136 -137 please check this sentence as it does not quite read correctly?

Furthermore, reliability [of] available studies that used curly hair [from] one or two individuals from non-African ancestry....

Line 143 - when referring to Why What How - I suggest re-iterating the questions again to keep the reader of this review clear about its objectives.

Fig 1 does not sufficiently show the retrocurvature aspect of the follicle that is know to be a fact in curly hair follicles. Furthermore the bulb is not show as hooked which is also known from histology. If the diagram is illustrative, then these features should be referenced in the Fig legend.

Line 179. The location of the bulge in human hair is not anatomically distinct. I would suggest that the authors describe the bulge as sitting at the isthmus of the follicle. The bulge is a formation of the outer root sheath and does not (to my knowledge) have its location between inner and outer root sheaths.

269 and 370 the authors refer to keratin assisting proteins which is a non-typical definition for KAP. While the KAPs may assist keratins, in the general nomenclature they are known as keratin associated proteins, and should be referred to thus.

446 - this is an interesting observation and I would suggest that the fine stick straight phenotype is a feature of senile hair whereas the same person may have had c= wavy hair when young. So, perhaps the authors can also mention the impact of age on fibre properties and that age match should be a factor in study design?

279 Cortical cells are formed by aggregated MFs  
I suggest cortical cells comprise aggregated MFs (cells are formed earlier that the MFs!)

Should Fig 3 and 4 legend reference the original Japanese study Ref 53/54

488 - The authors could consider referencing my review below for biology and genetic studies on hair curl.

Westgate GE, Ginger RS, Green MR. The biology and genetics of curly hair. *Exp Dermatol*. 2017 Jun;26(6):483-490. doi: 10.1111/exd.13347. Review.

515 "developed from the epidermis and dermis downwards....

558 - it would be nice to mention Bruno Bernard by name here?

## Review form: Referee 2 (Kenzo Koike)

**Can the paper be shortened without overall detriment to the main message?**

Yes

**Do you think some of the material would be more appropriate as an electronic appendix?**

Yes

**Do you have any ethical concerns with this paper?**

Yes

**Recommendation?**

Accept as is

**Comments to the Author(s)**

I think that it is a very good review by classifying various papers by purpose and examining their contents. It is wonderful to cover many papers from old to recent.

**Decision letter (RSPA-2019-0516.R0)**

17-Sep-2019

Dear Dr Ngoepe,

On behalf of the Reviews Editor, I am pleased to inform you that your Manuscript RSPA-2019-0516 entitled "The what, why and how of curly hair. A review" has been accepted for publication subject to minor revisions in Proceedings A. Please find the referees' comments below.

The reviewers have recommended publication, but also suggest some minor revisions to your manuscript. Therefore, I invite you to respond to the reviewers' comments and revise your manuscript. It is a condition of publication that you submit the revised version of your manuscript within 7 days. If you do not think you will be able to meet this date please let me know in advance of the due date.

To revise your manuscript, log into <https://mc.manuscriptcentral.com/prsa> and enter your Author Centre, where you will find your manuscript title listed under "Manuscripts with Decisions." Under "Actions," click on "Create a Revision." Your manuscript number has been appended to denote a revision.

You will be unable to make your revisions on the originally submitted version of the manuscript. Instead, revise your manuscript and upload a new version through your Author Centre.

When submitting your revised manuscript, you will be able to respond to the comments made by the referee(s) and upload a file "Response to Referees" in "Section 6 - File Upload". You can use this to document any changes you make to the original manuscript. In order to expedite the processing of the revised manuscript, please be as specific as possible in your response to the referee(s).

**IMPORTANT:** Your original files are available to you when you upload your revised manuscript. Please delete any redundant files before completing the submission process.

In addition to addressing all of the reviewers' and editor's comments, your revised manuscript **MUST** contain the following sections before the reference list (for any heading that does not apply to your work, please include a comment to this effect):

- Acknowledgements
- Funding statement

See <https://royalsociety.org/journals/authors/author-guidelines/> for further details.

When uploading your revised files, please make sure that you include the following as we cannot proceed without these:

- 1) A text file of the manuscript (doc, txt, rtf or tex), including the references, tables (including captions) and figure captions. Please remove any tracked changes from the text before submission. PDF files are not an accepted format for the "Main Document".
- 2) A separate electronic file of each figure (tif, eps or print-quality pdf preferred). The format should be produced directly from original creation package, or original software format.
- 3) Electronic Supplementary Material (ESM): all supplementary materials accompanying an accepted article will be treated as in their final form. Note that the Royal Society will not edit or typeset supplementary material and it will be hosted as provided. Please ensure that the supplementary material includes the paper details where possible (authors, article title, journal name). Supplementary files will be published alongside the paper on the journal website and posted on the online figshare repository (<https://figshare.com>). The heading and legend provided for each supplementary file during the submission process will be used to create the figshare page, so please ensure these are accurate and informative so that your files can be found in searches. Files on figshare will be made available approximately one week before the accompanying article so that the supplementary material can be attributed a unique DOI. Alternatively you may upload a zip folder containing all source files for your manuscript as described above with a PDF as your "Main Document". This should be the full paper as it appears when compiled from the individual files supplied in the zip folder.

#### Article Funder

Please ensure you fill in the Article Funder question on page 2 to ensure the correct data is collected for FundRef (<http://www.crossref.org/fundref/>).

#### Media summary

Please ensure you include a short non-technical summary (up to 100 words) of the key findings/importance of your paper. This will be used for to promote your work and marketing purposes (e.g. press releases). The summary should be prepared using the following guidelines:

\*Write simple English: this is intended for the general public. Please explain any essential technical terms in a short and simple manner.

\*Describe (a) the study (b) its key findings and (c) its implications.

\*State why this work is newsworthy, be concise and do not overstate (true 'breakthroughs' are a rarity).

\*Ensure that you include valid contact details for the lead author (institutional address, email address, telephone number).

#### Cover images

We welcome submissions of images for possible use on the cover of Proceedings A. Images should be square in dimension and please ensure that you obtain all relevant copyright permissions before submitting the image to us. If you would like to submit an image for consideration please send your image to [proceedingsa@royalsociety.org](mailto:proceedingsa@royalsociety.org)

Once again, thank you for submitting your manuscript to Proceedings A and I look forward to receiving your revision. If you have any questions at all, please do not hesitate to get in touch.

Best wishes

Raminder Shergill  
proceedingsa@royalsociety.org  
Proceedings A

on behalf of  
Professor Michel Destradre  
Reviews Editor  
Proceedings A

Reviewers' Comments to Author:

Referee: 1

Comments to the Author(s)

This is a very readable review of what is a complex topic that relies on many disciplines for its study. I really enjoyed reading the paper and offer the following suggestions to help make some small improvements.

line 136 -137 please check this sentence as it does not quite read correctly?

Furthermore, reliability [of] available studies that used curly hair [from] one or two individuals from non-African ancestry....

Line 143 - when referring to Why What How - I suggest re-iterating the questions again to keep the reader of this review clear about its objectives.

Fig 1 does not sufficiently show the retrocurvature aspect of the follicle that is known to be a fact in curly hair follicles. Furthermore the bulb is not shown as hooked which is also known from histology. If the diagram is illustrative, then these features should be referenced in the Fig legend.

Line 179. The location of the bulge in human hair is not anatomically distinct. I would suggest that the authors describe the bulge as sitting at the isthmus of the follicle. The bulge is a formation of the outer root sheath and does not (to my knowledge) have its location between inner and outer root sheaths.

269 and 370 the authors refer to keratin assisting proteins which is a non-typical definition for KAP. While the KAPs may assist keratins, in the general nomenclature they are known as keratin associated proteins, and should be referred to thus.

446 - this is an interesting observation and I would suggest that the fine stick straight phenotype is a feature of senile hair whereas the same person may have had wavy hair when young. So, perhaps the authors can also mention the impact of age on fibre properties and that age match should be a factor in study design?

279 Cortical cells are formed by aggregated MFs  
I suggest cortical cells comprise aggregated MFs (cells are formed earlier than the MFs!)

Should Fig 3 and 4 legend reference the original Japanese study Ref 53/54

488 - The authors could consider referencing my review below for biology and genetic studies on hair curl.

Westgate GE, Ginger RS, Green MR. The biology and genetics of curly hair. *Exp Dermatol*. 2017 Jun;26(6):483-490. doi: 10.1111/exd.13347. Review.

515 "developed from the epidermis and dermis downwards....

558 - it would be nice to mention Bruno Bernard by name here?

Referee: 2

Comments to the Author(s)

I think that it is a very good review by classifying various papers by purpose and examining their contents. It is wonderful to cover many papers from old to recent.

## Author's Response to Decision Letter for (RSPA-2019-0516.R0)

See Appendix A.

## Decision letter (RSPA-2019-0516.R1)

16-Oct-2019

Dear Dr Ngoepe

On behalf of the Editor, I am pleased to inform you that your manuscript entitled "The what, why and how of curly hair. A review" has been accepted in its final form for publication in *Proceedings A*.

Our Production Office will be in contact with you in due course. You can expect to receive a proof of your article soon. Please contact the office to let us know if you are likely to be away from e-mail in the near future. If you do not notify us and comments are not received within 5 days of sending the proof, we may publish the paper as it stands.

Open access

You are invited to opt for open access, our author pays publishing model. Payment of open access fees will enable your article to be made freely available via the Royal Society website as soon as it is ready for publication. For more information about open access please visit [http://royalsocietypublishing.org/site/authors/open\\_access.xhtml](http://royalsocietypublishing.org/site/authors/open_access.xhtml). The open access fee for this journal is £1700/\$2380/€2040 per article. VAT will be charged where applicable.

Note that if you have opted for open access then payment will be required before the article is published – payment instructions will follow shortly. If you wish to opt for open access then please inform the editorial office ([proceedingsa@royalsociety.org](mailto:proceedingsa@royalsociety.org)) as soon as possible.

Your article has been estimated as being 27 pages long. Our Production Office will inform you of the exact length at the proof stage.

Proceedings A levies charges for articles which exceed 20 printed pages. (based upon approximately 540 words or 2 figures per page). Articles exceeding this limit will incur page charges of £150 per page or part page, plus VAT (where applicable).

Under the terms of our licence to publish you may post the author generated postprint (ie. your accepted version not the final typeset version) of your manuscript at any time and this can be made freely available. Postprints can be deposited on a personal or institutional website, or a recognised server/repository. Please note however, that the reporting of postprints is subject to a media embargo, and that the status the manuscript should be made clear. Upon publication of the definitive version on the publisher's site, full details and a link should be added.

You can cite the article in advance of publication using its DOI. The DOI will take the form: 10.1098/rspa.XXXX.YYYY, where XXXX and YYYY are the last 8 digits of your manuscript number (eg. if your manuscript number is RSPA-2017-1234 the DOI would be 10.1098/rspa.2017.1234).

For tips on promoting your accepted paper see our blog post:  
<https://blogs.royalsociety.org/publishing/promoting-your-latest-paper-and-tracking-your-results/>

Thank you for your submission. On behalf of the Editors of the journal, we look forward to your continued contributions to the Journal.

Best wishes

Raminder Shergill,  
Proceedings A Editorial Office  
[proceedingsa@royalsociety.org](mailto:proceedingsa@royalsociety.org)

# Appendix A

## Response to Reviewers Comments

We wish to thank the reviewers for their comments. They were insightful and have helped to strengthen our manuscript. Please see below for itemised responses to the issues raised.

### Comments to the Author(s)

This is a very readable review of what is a complex topic that relies on many disciplines for its study. I really enjoyed reading the paper and offer the following suggestions to help make some small improvements.

**Line 136 -137: Please check this sentence as it does not quite read correctly? Furthermore, reliability available studies that used curly hair one or two individuals from non-African ancestry....**

Lines 136 – 138 have been adapted to: Furthermore, reliability of available studies that used curly hair from one or two individuals of non-African ancestry are too limited in scope to generalised results.

**Line 143: When referring to Why What How - I suggest re-iterating the questions again to keep the reader of this review clear about its objectives.**

Lines 143 – 146 have been adapted to: In seeking to answer the three questions through the literature review (i.e 'what' does curly hair look like (structurally), 'why' does some hair curl, and 'how' does curly hair behave), it was necessary to separate the various research activities on curly hair into sensible categories.

**Fig 1 does not sufficiently show the retrocurvature aspect of the follicle that is know to be a fact in curly hair follicles. Furthermore the bulb is not show as hooked which is also known from histology. If the diagram is illustrative, then these features should be referenced in the Fig legend.**

Figure 1 has been updated to reflect the points mentioned.

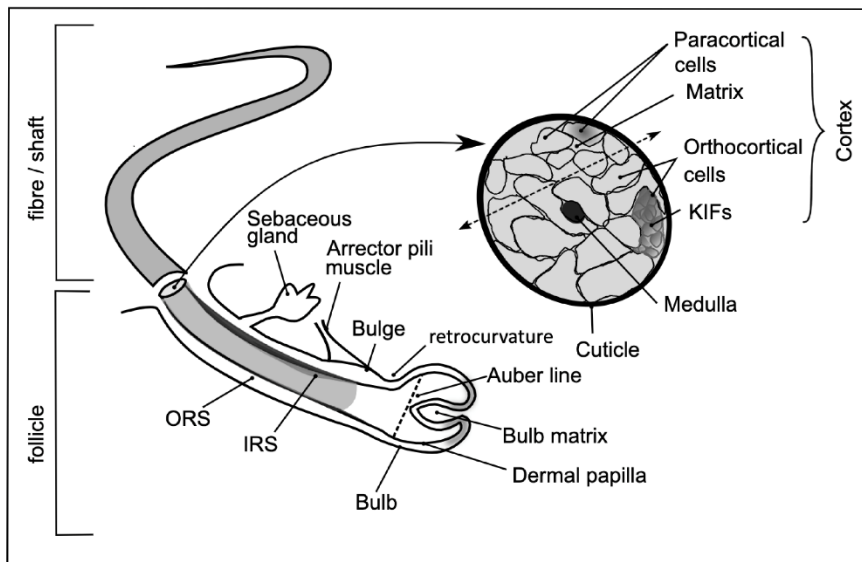

**Line 179: The location of the bulge in human hair is not anatomically distinct. I would suggest that the authors describe the bulge as sitting at the isthmus of the follicle. The bulge is a formation of the outer root sheath and does not (to my knowledge) have its location between inner and outer root sheaths.**



Lines 179 – 180 have been adapted to: The bulge, being one of the stem cell reservoirs that sustain lower follicle growth, sits at the isthmus of the follicle.

**Lines 269 and 370: The authors refer to keratin assisting proteins which is a non-typical definition for KAP. While the KAPs may assist keratins, in the general nomenclature they are known as keratin associated proteins, and should be referred to thus.**

Lines 268 – 270 have been adapted to: Accordingly, the cortex forms the greater part of the fibre and comprises keratin proteins (KPs) that are imbedded in an amorphous space, called the matrix. The matrix is composed of keratin associated proteins (KAPs) and other structures, not relevant here.

Line 371 has been adapted to: Keratin assisting/associating structures in the cortex

**Line 446: This is an interesting observation and I would suggest that the fine stick straight phenotype is a feature of senile hair whereas the same person may have had wavy hair when young. So, perhaps the authors can also mention the impact of age on fibre properties and that age match should be a factor in study design?**

The observation made refers to the mechanical-dimensional relationship (lines 444-446). While we agree that age has an influence on hair thickness, the introduction of this parameter is likely to introduce too much complexity to the current train of thought. Furthermore, introduction of the influence of age on hair thickness, would be incomplete without mentioning other influential factors on hair thickness such as nutrition, genetics, etc. Since the primary focus of the paper is on curvature, rather than hair thickness, and the specific text considers mechanical-dimensional linkages, the authors have chosen to focus on that aspect of the paper.

**Line 279: Cortical cells are formed by aggregated MFs. I suggest cortical cells comprise aggregated MFs (cells are formed earlier than the MFs!)**

Line 280 has been adapted to: Cortical cells comprise aggregated MFs, which in turn comprise aggregated IFs.

**Should Fig 3 and 4 legend reference the original Japanese study Ref 53/54?**

The caption for Figures 3 and 4 now include (adapted from (53,54))

**Line 488: The authors could consider referencing my review below for biology and genetic studies on hair curl. Westgate GE, Ginger RS, Green MR. The biology and genetics of curly hair. Exp Dermatol. 2017 Jun;26(6):483-490. doi: 10.1111/exd.13347. Review.**

Line 490 has been adapted to: Westgate, Ginger & Green (75) offered a valuable review of the biology and genetics of the curly fibre.

**Line 515: developed from the epidermis and dermis downwards....**

Lines 516 – 518 have been adapted to: The hair follicle (described earlier) is a dynamic structure, developing from the epidermis and dermis downwards, that is subjected to different cycles (25,26)

**Line 558: It would be nice to mention Bruno Bernard by name here?**

Lines 559 – 562 have been adapted to: There are still many data gaps when considering the reason for fibre curvature. As aptly described by Bernard, 'much knowledge about hair follicle biology have been acquired in the last 70 years, but the code for molecular and cellular behaviour of the follicle has not yet been broken' (24)
